# Supplementary material for: A novel framework for horizontal and vertical data integration in cancer studies with application to survival time prediction models
Source: PubMed Central journal article supplement (PMC6868770; doi:10.1186/s13062-019-0249-6), 2019-11-21
Supplement: 13062_2019_249_MOESM1_ESM.pdf [file 13062_2019_249_MOESM1_ESM.pdf]

**Table A. Aggregated results of cross-validation, using separate clinical features, i.e. no TICF; and relational network.**

| ML Model   | Train R2 |       | Explained Variance |       | Negative Mean Absolute Error |       | Negative Median Absolute Error |       |
|------------|----------|-------|--------------------|-------|------------------------------|-------|--------------------------------|-------|
|            | Mean     | StD   | Mean               | StD   | Mean                         | StD   | Mean                           | StD   |
| SVR-RBF    | 0.206    | 0.044 | 0.230              | 0.023 | -54.923                      | 5.267 | -49.310                        | 8.098 |
| SVR-LINEAR | 0.972    | 0.009 | 0.973              | 0.008 | -5.494                       | 1.009 | -5.312                         | 1.515 |
| DTR        | 0.991    | 0.004 | 0.991              | 0.004 | -5.258                       | 1.125 | -4.443                         | 1.235 |
| SVR-POLY   | 0.883    | 0.020 | 0.886              | 0.021 | -18.900                      | 1.112 | -14.272                        | 3.289 |
