# Supplementary material for: A novel framework for horizontal and vertical data integration in cancer studies with application to survival time prediction models
Source: PubMed Central journal article supplement (PMC6868770; doi:10.1186/s13062-019-0249-6), 2019-11-21
Supplement: 13062_2019_249_MOESM2_ESM.pdf [file 13062_2019_249_MOESM2_ESM.pdf]

Table B. Aggregated results of cross-validation, using TICF; without the relational network.

| ML Model   | Train R2 |       | Explained Variance |       | Negative Mean Absolute Error |        | Negative Median Absolute Error |       |
|------------|----------|-------|--------------------|-------|------------------------------|--------|--------------------------------|-------|
|            | Mean     | StD   | Mean               | StD   | Mean                         | StD    | Mean                           | StD   |
| SVR-RBF    | 0.119    | 0.171 | 0.283              | 0.041 | -35.024                      | 3.852  | -31.768                        | 8.111 |
| SVR-LINEAR | 0.876    | 0.024 | 0.896              | 0.015 | -13.733                      | 2.758  | -12.726                        | 2.579 |
| DTR        | 0.984    | 0.011 | 0.988              | 0.006 | -4.727                       | 1.760  | -4.449                         | 1.709 |
| SVR-POLY   | 0.006    | 1.845 | 0.102              | 1.708 | -21.943                      | 13.774 | -14.637                        | 4.944 |
