# Supplementary material for: A novel framework for horizontal and vertical data integration in cancer studies with application to survival time prediction models
Source: PubMed Central journal article supplement (PMC6868770; doi:10.1186/s13062-019-0249-6), 2019-11-21
Supplement: 13062_2019_249_MOESM3_ESM.pdf [file 13062_2019_249_MOESM3_ESM.pdf]

**Table C. Aggregated results of cross-validation, using separate clinical features, i.e. no TICF; without the relational network. NA means that the model didn't converge.**

| ML Model   | Train R2 |       | Explained Variance |       | Negative Mean Absolute Error |       | Negative Median Absolute Error |       |
|------------|----------|-------|--------------------|-------|------------------------------|-------|--------------------------------|-------|
|            | Mean     | StD   | Mean               | StD   | Mean                         | StD   | Mean                           | StD   |
| SVR-RBF    | NA       | NA    | NA                 | NA    | NA                           | NA    | NA                             | NA    |
| SVR-LINEAR | 0.866    | 0.025 | 0.877              | 0.029 | -14.485                      | 2.359 | -12.594                        | 2.025 |
| DTR        | 0.985    | 0.013 | 0.987              | 0.011 | -4.526                       | 2.133 | -4.088                         | 1.684 |
| SVR-POLY   | 0.764    | 0.073 | 0.805              | 0.033 | -17.165                      | 1.376 | -14.516                        | 1.963 |
