# Supplementary material for: A novel framework for horizontal and vertical data integration in cancer studies with application to survival time prediction models
Source: PubMed Central journal article supplement (PMC6868770; doi:10.1186/s13062-019-0249-6), 2019-11-21
Supplement: 13062_2019_249_MOESM4_ESM.pdf [file 13062_2019_249_MOESM4_ESM.pdf]

**Table D. Execution time of the applied ML models per iteration. in terms of time of training, predict and total time which are sum of the train plus predict time.**

| <b>ML Model</b> | <b>Train (s)</b> | <b>Predict (s)</b> | <b>Total (s)</b> |
|-----------------|------------------|--------------------|------------------|
| SVR-RBF         | 0.070589066      | 0.001976013        | 0.072565079      |
| SVR-LINEAR      | 0.050335884      | 0.000173092        | 0.050508976      |
| DTR             | 0.028145075      | 0.000221968        | 0.028367043      |
| SVR-POLY        | 0.479592085      | 0.001157999        | 0.480750084      |
